# Supplementary material for: Co-dissolution of cellulose and silk fibroin in levulinic acid-derived protic ionic liquids for composited membrane and fiber preparation
Source: Royal Society of Chemistry journal article supplement (doi:10.1039/d1gc02837e), 2021-01-01
Supplement: d1gc02837e1.pdf [file d1gc02837e1.pdf]

## Supporting information

### Co-dissolution of cellulose and silk fibroin in levulinic acid-derived protic ionic liquids for composited membrane and fiber preparation

Wang Yue,<sup>a</sup> Lihua Zhang,<sup>a</sup> Lulu Deng,<sup>a</sup> Yuanlong Guo,<sup>a</sup> Qinqin Xu,<sup>a</sup> Wei Peng,<sup>b</sup> Peng Chen,<sup>c</sup> Haibo Xie,\*<sup>a</sup> Guanglong Zou,<sup>d</sup> Songmiao Liang\*<sup>b</sup>

<sup>a</sup>Department of Polymer Materials and Engineering, College of Materials and Metallurgy, Guizhou University, Guiyang, 550025, China. E-mail: hbxie@gzu.edu.cn

<sup>b</sup>Separation Membrane Materials & Technologies Joint Research Centre of Vontron-Guizhou University, Vontron Technol Co Ltd, Guiyang 550018, China.

<sup>c</sup>Ningbo Institute of Materials Technology and Engineering (NIMTE), CAS, Ningbo, 315201, China

<sup>d</sup>School of Chemical Engineering, Guizhou Minzu University, Guiyang 550025, PR China

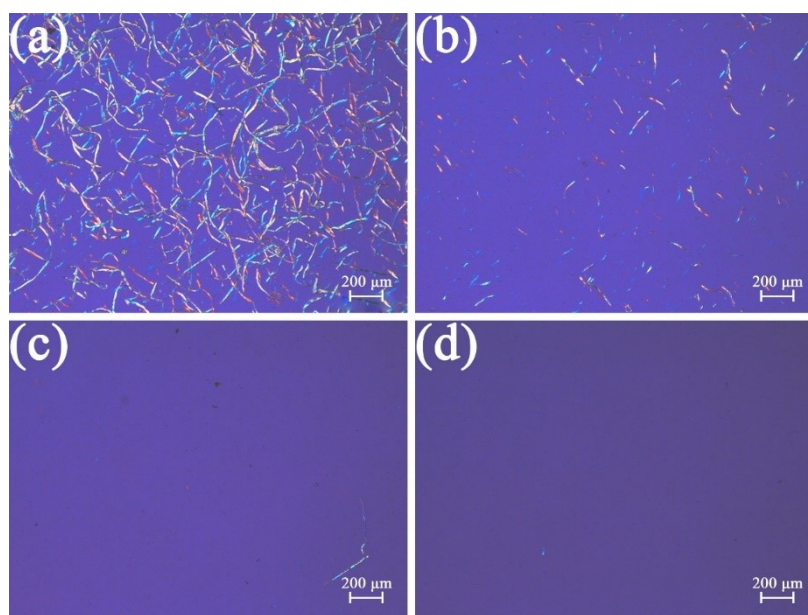

**Fig. S1** POM Diagram of C100S0 at Different Time in PILs. (a) 5min. (b) 10min. (c) 20min. (d) 30min.

| Recycled Solvent  | Precipitate | Film | State            |
|-------------------|-------------|------|------------------|
| Methanol          | Y           | Y    | White film       |
| Ethanol           | Y           | Y    | Transparent film |
| Isopropyl alcohol | Y           | N    | Floccule         |

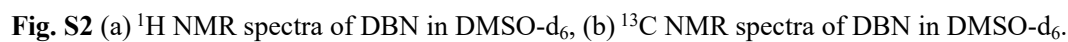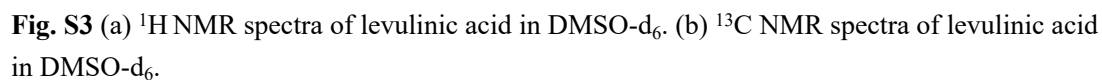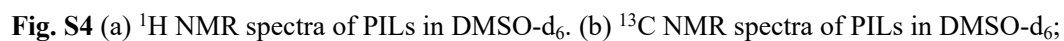

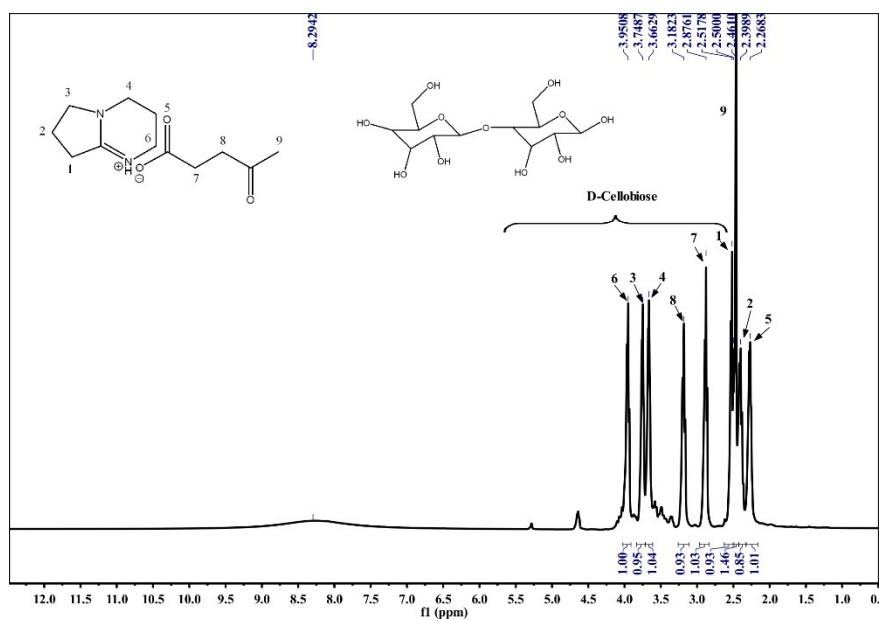

**Fig. S5** Changes of  $^1\text{H}$  NMR in PILs before and after dissolution.

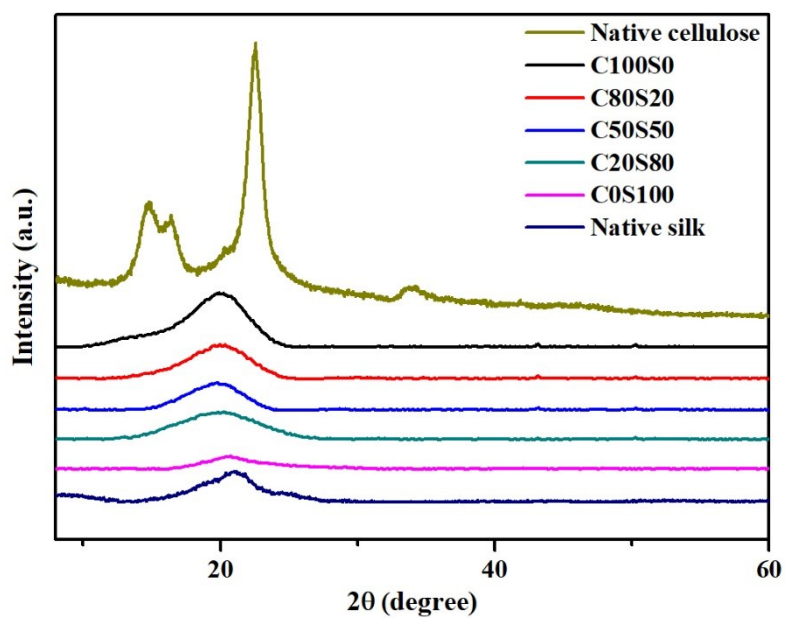

**Fig. S6** WAXS patterns of cellulose/silk fibroin composited membranes with different composite ratios.

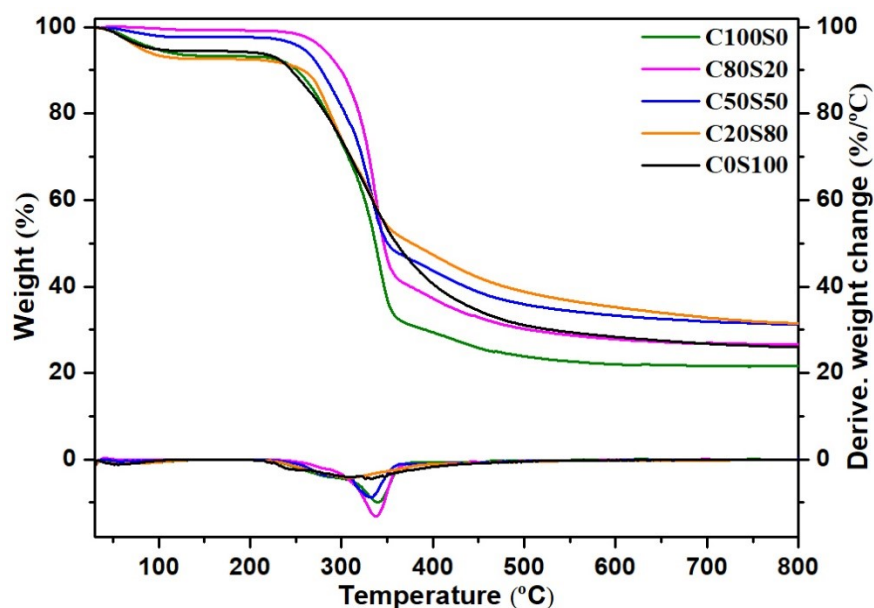

**Fig. S7** Thermogravimetric analysis (TGA) and derivative thermogravimetric (DTG) curves of C100S0, C80S20, C50S50, C20S80, and C0S100 films.

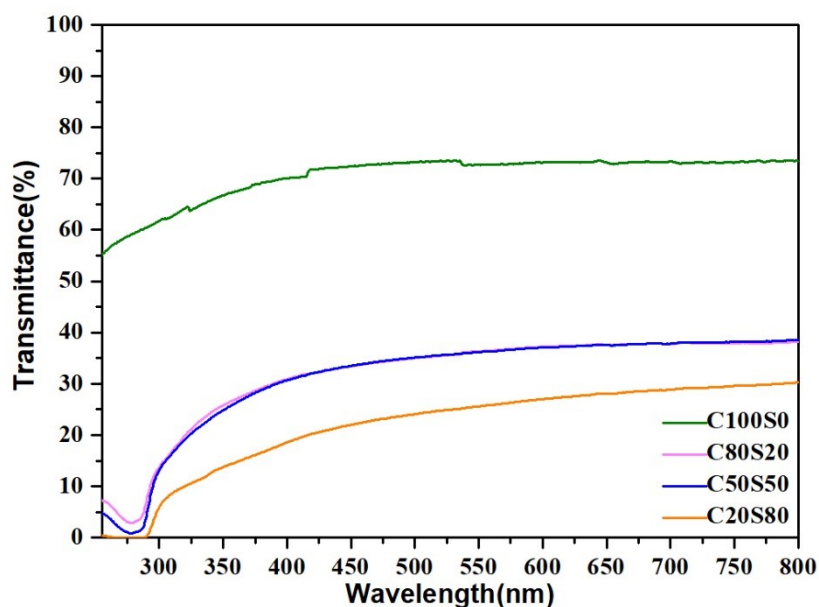

**Figure S8.** Ultraviolet transmittance of C100S0, C80S20, C50S50, and C20S80.

**Table S2** The barrier grade of the film was evaluated by oxygen transmittance

| Grade     | Oxygen Permeability( $\text{cm}^3/(\text{m}^2 \cdot 24\text{h})$ ) | Example <sup>a</sup>                               |
|-----------|--------------------------------------------------------------------|----------------------------------------------------|
| Low       | 4000-40000                                                         | PVC 4252, BOPP 113204,<br>PHA 150003, PLA 305005   |
| Medium    | 400-4000                                                           | EVOH wet 787, OPET 1181,<br>PA 6 wt 1972, PET 3543 |
| High      | 40-400                                                             | PVDC 98, PA 6 dry 449                              |
| Very high | <40                                                                | EVOH dry 3.93                                      |
